# Supplementary material
Source: ML conference proceedings conference paper supplement (https://proceedings.neurips.cc/paper_files/paper/2019/hash/a9ad5f2808f68eea468621a04c49efe1-Abstract.html)
Supplement: Supplementary file 1 [file a9ad5f2808f68eea468621a04c49efe1-Supplemental.zip]

Archive with 1 entries (1 files):
- supplement_NeurIPS_2019.pdf
