# Supplementary material
Source: ML conference proceedings conference paper supplement (https://proceedings.neurips.cc/paper_files/paper/2019/hash/a9ad5f2808f68eea468621a04c49efe1-Abstract.html)
Supplement: Supplementary file 1 [file a9ad5f2808f68eea468621a04c49efe1-Supplemental.zip › supplement_NeurIPS_2019.pdf]

---

# Supplementary Materials

---

**Jennifer L. Cardona**  
Department of Mechanical Engineering  
Stanford University  
Stanford, CA 94305  
jcard27@stanford.edu

**Michael F. Howland**  
Department of Mechanical Engineering  
Stanford University  
Stanford, CA 94305  
mhowland@stanford.edu

**John O. Dabiri**  
Graduate Aerospace Laboratories (GALCIT)  
and Mechanical Engineering  
California Institute of Technology  
Pasadena, CA 91125  
jodabiri@caltech.edu

## 1 Wind Speed Distributions

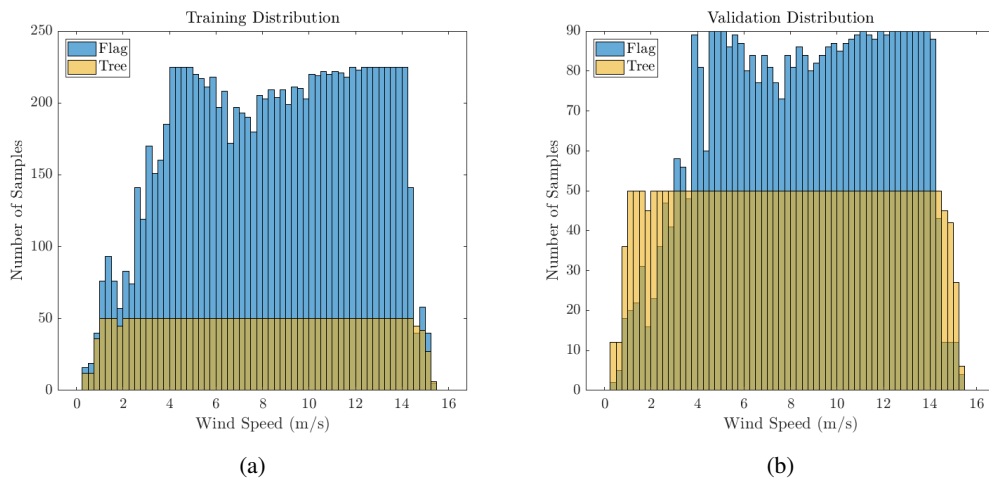

Figure 1: Wind speed distributions for the final (a) training set and (b) validation set.
